# Supplementary material
Source: PubMed Central journal article supplement (PMC4076364)

**Supplemental Figure S1. Representative luminescence recordings of SCN and peripheral oscillators from cycling *per1-luciferase* rats.** Representative traces of *per1-luc* expression in (A) liver, (B) kidney, (C) lung, (D) WAT, (E) cornea, (F) SCN, (G) ovarian follicle, (H) oviduct and (I) pituitary gland tissue.

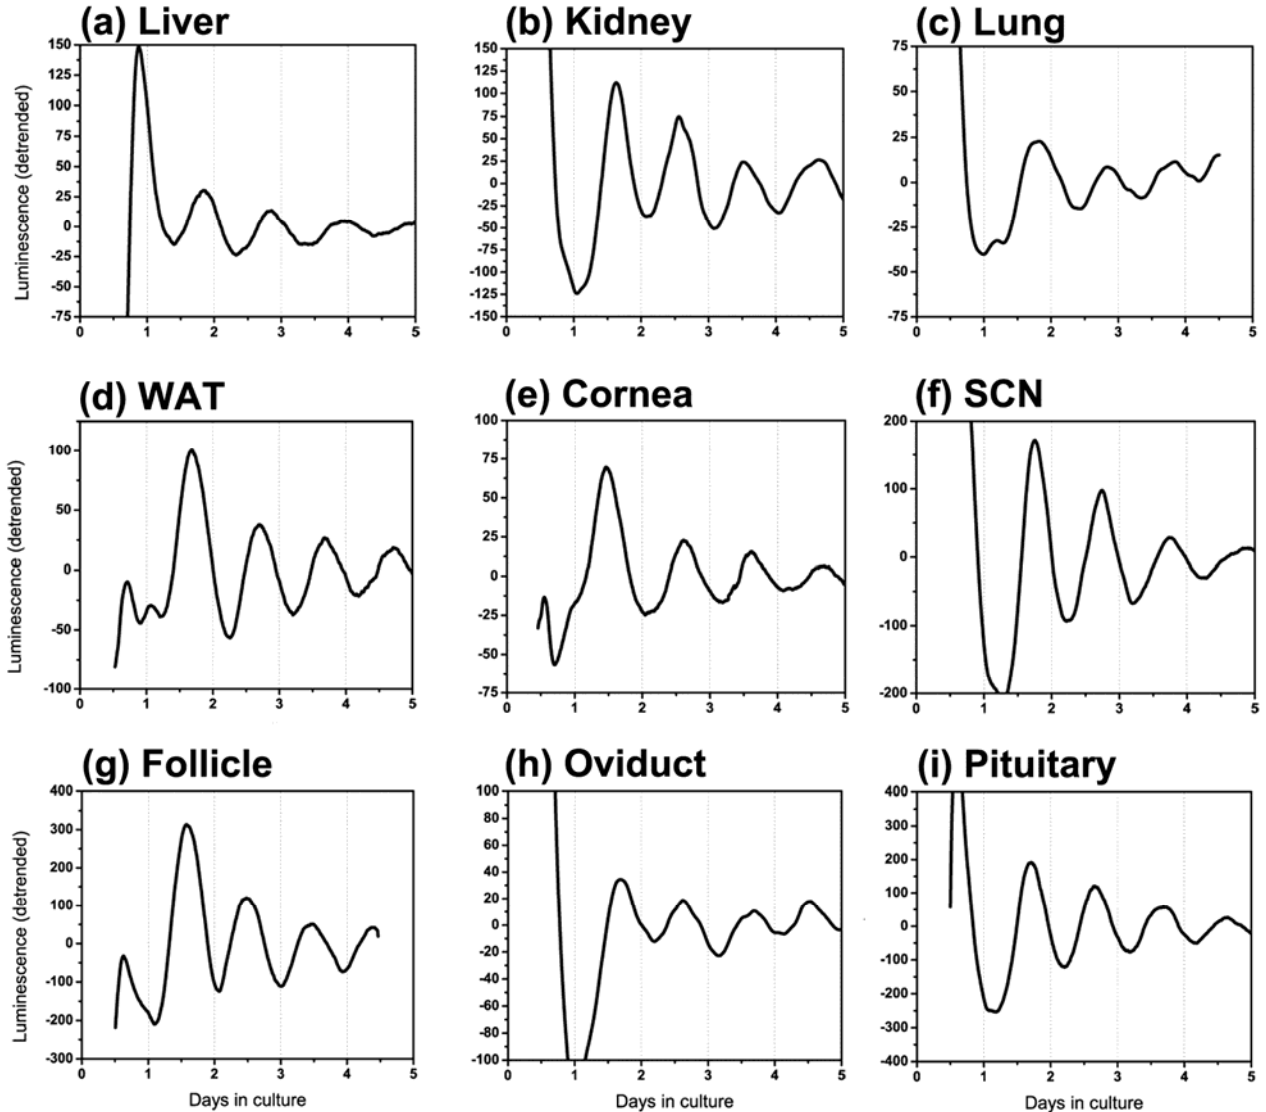

**Supplemental Figure S2. Effects of cyclo- $\beta$ -dextran sugar-cage on *per1-luc* expression in SCN tissue explants.** (a) The cyclo- $\beta$ -dextran molecule that comprises the “sugar-cage” for water-soluble steroid hormones does not affect the period of *per1-luc* expression in SCN tissue. (b) High concentration E2+P4 (500 $\mu$ M) cause severe damping and lengthen the period of *per1-luc* expression in SCN. This damping effect is not due to cell death but rather dissociation of individual pacemakers, as a robust rhythm reappears after synchronization with forskolin (gray circle; 15  $\mu$ M for 20 min).

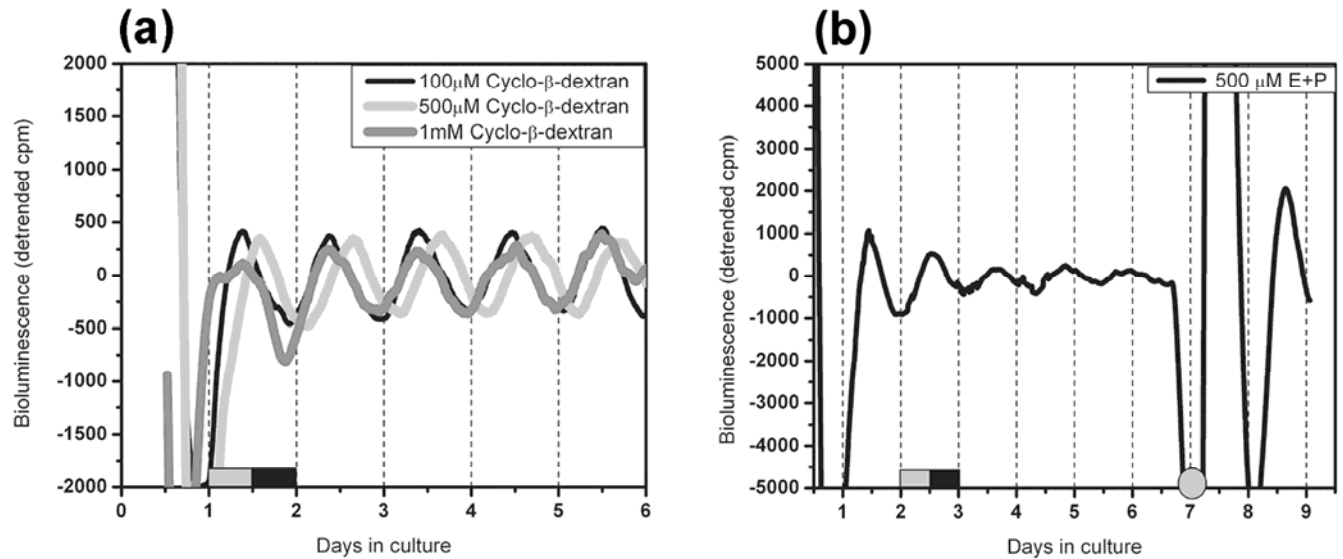

Supplement: supp_113.109322_biolreprod.113.109322-1.pdf [file supp_113.109322_biolreprod.113.109322-1.pdf]
